# Supplementary material for: Comparative study on different strategies for synthesizing all-silica DD3R zeolite crystals with a uniform morphology and size
Source: Royal Society of Chemistry journal article supplement (doi:10.1039/d0ra04293e), 2020-01-01
Supplement: d0ra04293e1.pdf [file d0ra04293e1.pdf]

## Supplementary information

### Comparative study on different strategies for synthesizing all-silica DD3R zeolite crystals with uniform morphology and size

Anna Peng,<sup>a</sup> Xinqing Lu,<sup>\*a,b</sup> Rui Ma,<sup>a,b</sup> Yanghe Fu,<sup>a,b</sup> Shuhua Wang<sup>c</sup> and Weidong Zhu<sup>\*a,b,c</sup>

<sup>a</sup> *Zhejiang Engineering Laboratory for Green Syntheses and Applications of Fluorine-Containing Specialty Chemicals, Institute of Advanced Fluorine-Containing Materials, Zhejiang Normal University, 321004 Jinhua, People's Republic of China*

<sup>b</sup> *Key Laboratory of the Ministry of Education for Advanced Catalysis Materials, Institute of Physical Chemistry, Zhejiang Normal University, 321004 Jinhua, People's Republic of China*

<sup>c</sup> *National Engineering Technology Research Center of Fluoro-Materials, Zhejiang Juhua Technology Center Co., Ltd., 324004 Quzhou, People's Republic of China*

Corresponding Authors

E-mails: xinqinglu@zjnu.cn (X. Lu); weidongzhu@zjnu.cn (W. Zhu)

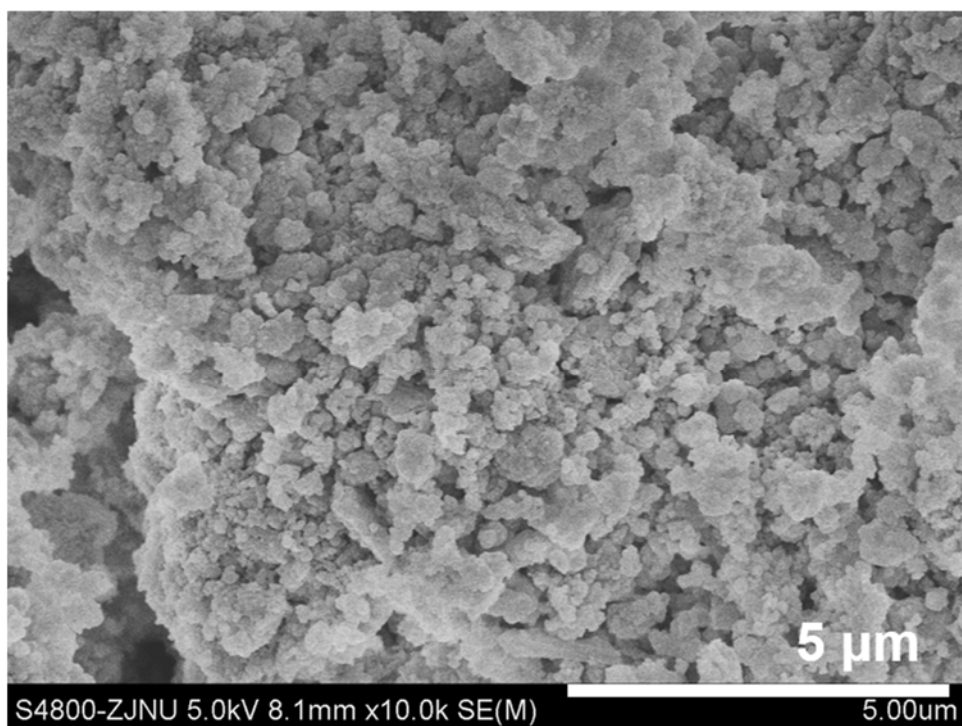

Fig. S1 SEM image of the “amorphous” DD3R seeds.

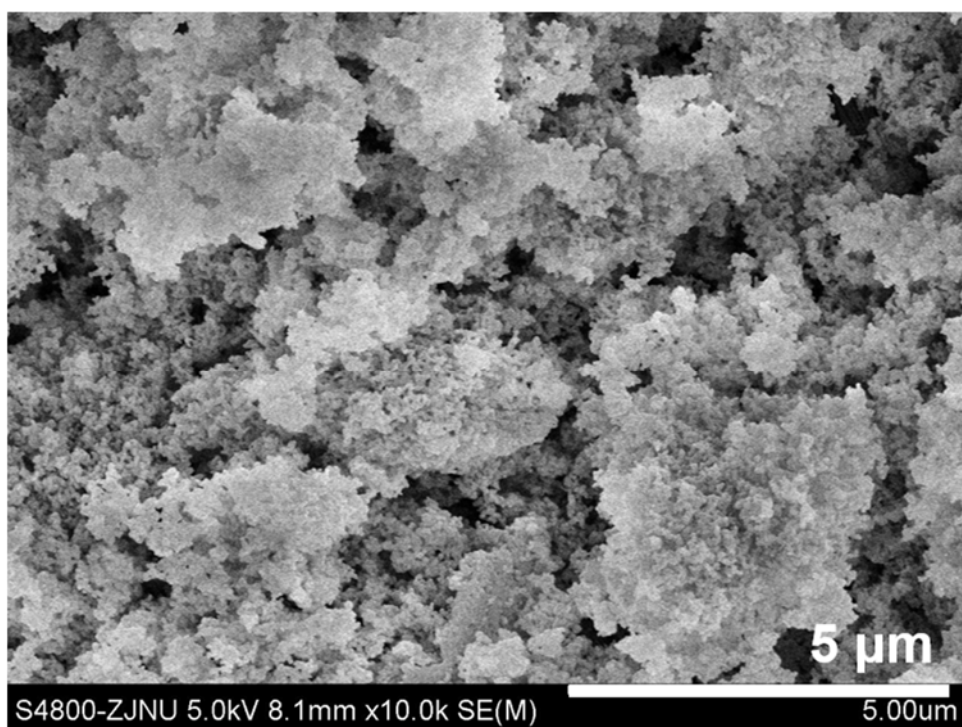

Fig. S2 SEM image of the “amorphous” ZSM-58 seeds.

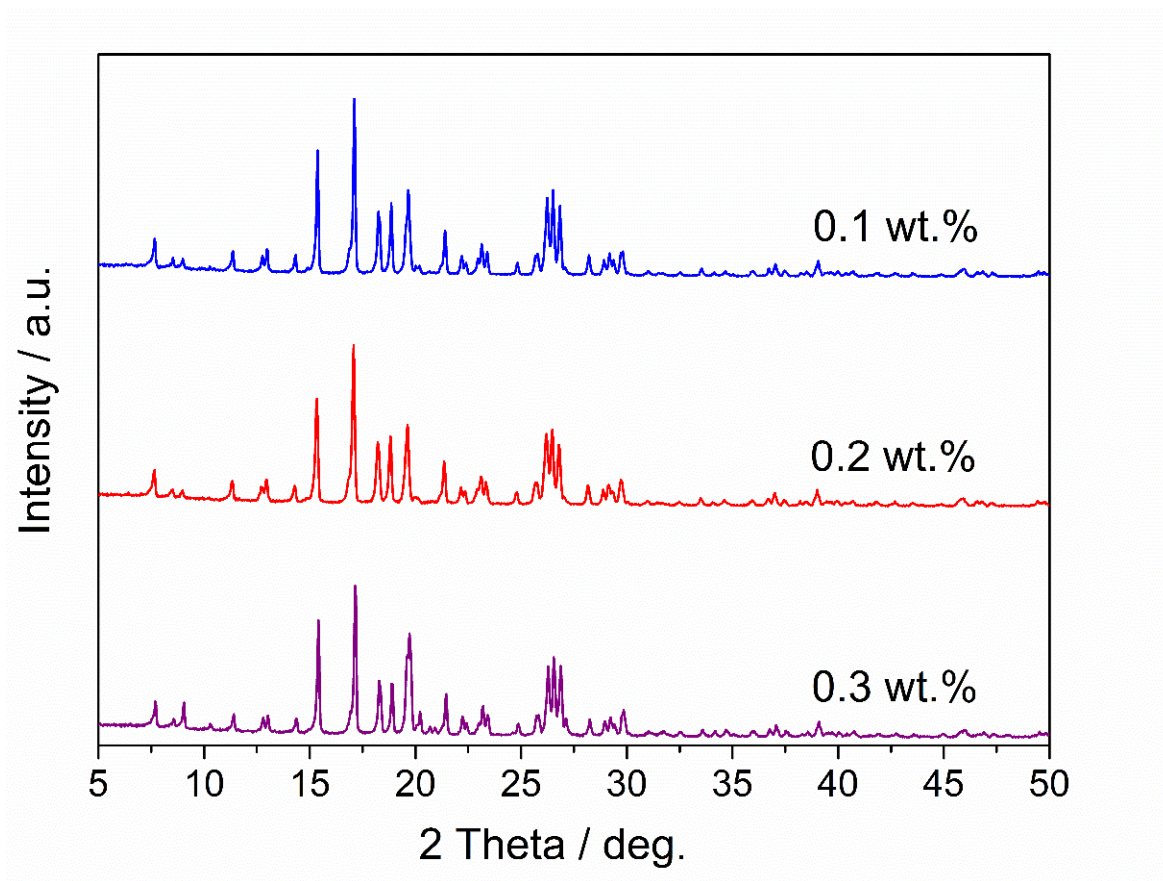

Fig. S3 XRD patterns of the DD3R crystals synthesized using "amorphous" DD3R seeds with different amounts.

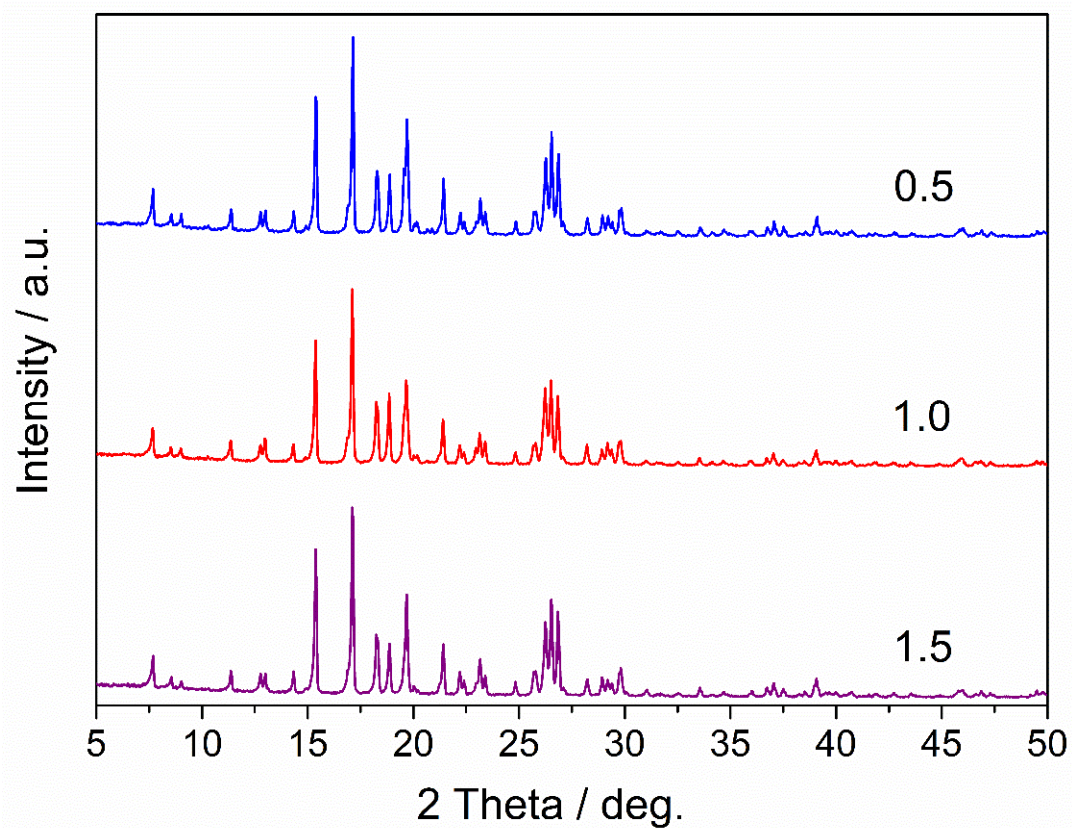

Fig. S4 XRD patterns of the DD3R crystals synthesized using 0.1 wt.% of “amorphous” DD3R seeds with different KF/SiO<sub>2</sub> molar ratios.

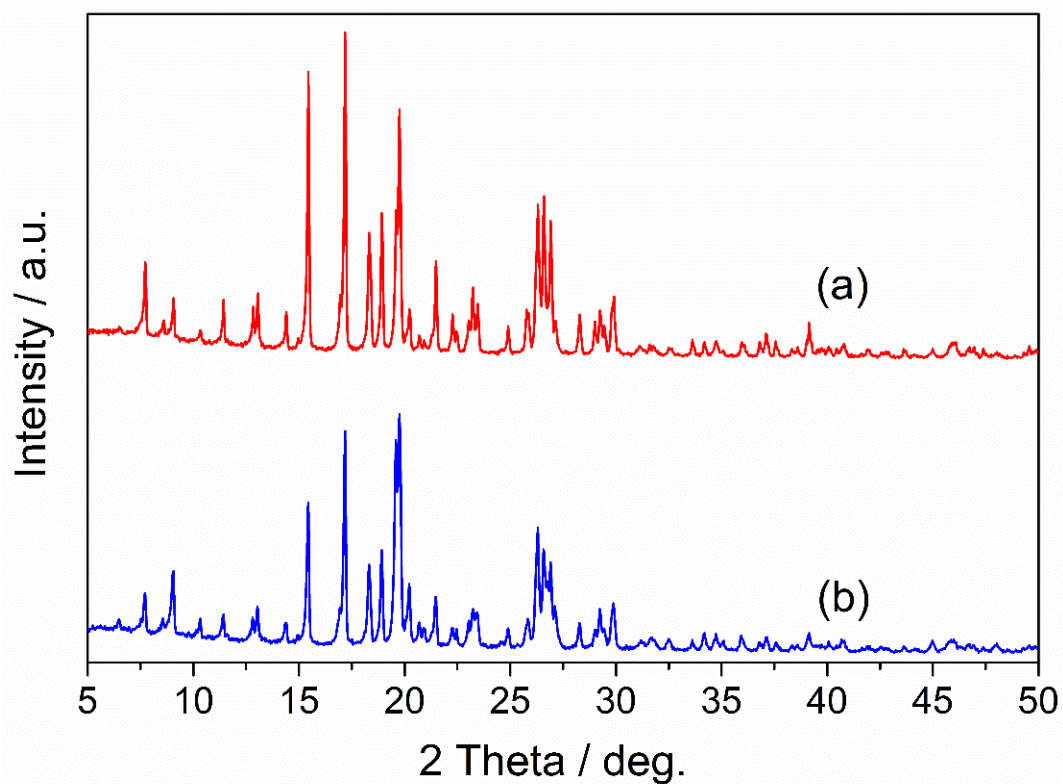

Fig. S5 XRD patterns of the DD3R crystals synthesized using 0.1 wt.% of “amorphous” DD3R seeds with different gel molar compositions: 47 1-ADA : 100 SiO<sub>2</sub> : 100 KF : 6000 H<sub>2</sub>O (a) and 47 1-ADA : 100 SiO<sub>2</sub> : 100 KF : 8000 H<sub>2</sub>O : 2 KOH (b).

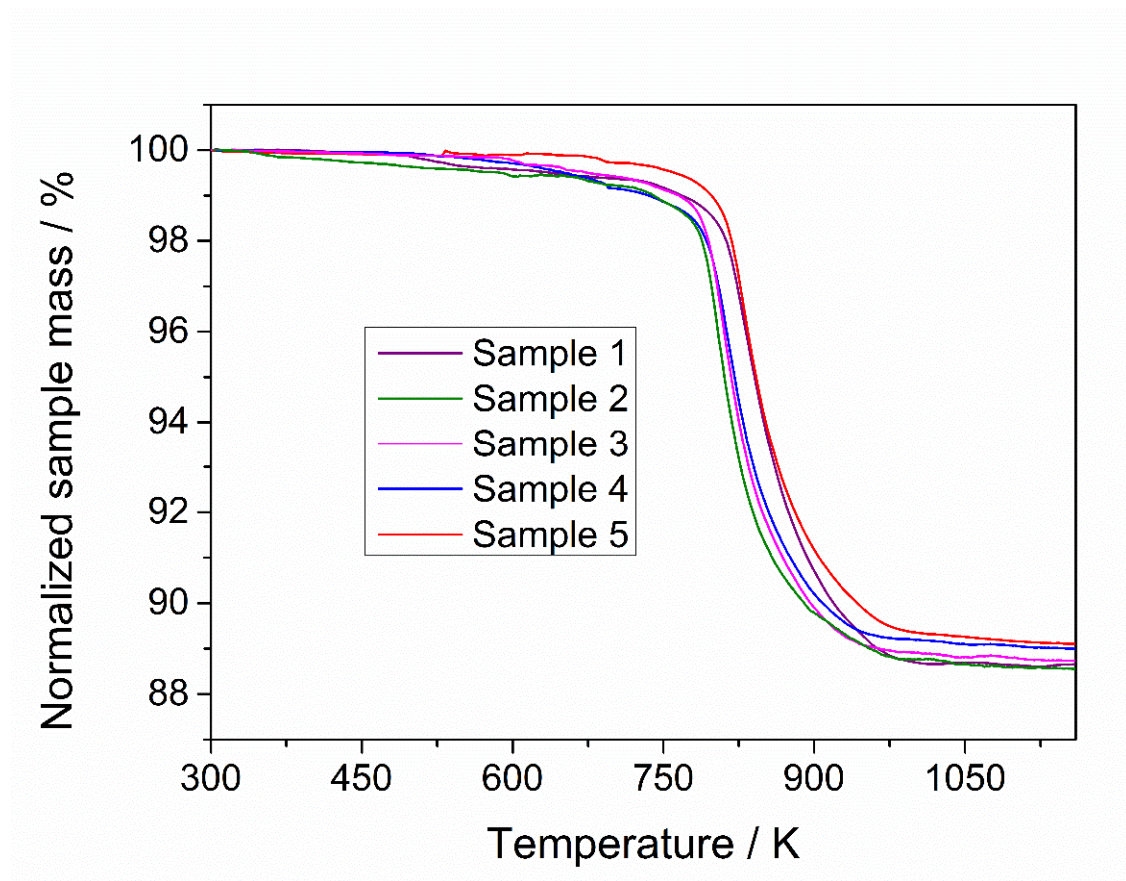

Fig. S6 TGA curves of the synthesized DD3R samples represented in Table 2.
